# Supplementary material for: Inhibitory peptidergic modulation of C. elegans serotonin neurons is gated by T-type calcium channels
Source: eLife. 2017 Feb 6;6:e22771. doi: 10.7554/eLife.22771 (PMC5330680; doi:10.7554/eLife.22771)
Supplement: Figure 1—source data 1. — DOI: http://dx.doi.org/10.7554/eLife.22771.003 [file elife-22771-fig1-data1.xlsx]

## Sheet: Sheet1
wild type
N2 totals	from "egg_laying_data_NR_noodle"
date	1-8	9-25	26+	comma	2-fold	3-fold	L1	day total
2012_8_8	0	2	22	0	0	0	0	24
2012_8_9	0	0	32	0	0	0	0	32
2012_8_21	0	0	26	0	0	1	0	27
2012_9_6	0	2	32	0	0	0	0	34
2012_9_11	0	3	18	1	0	0	0	22
2012_10_2	0	2	22	0	0	0	0	24
2012_10_3	1	3	7	0	0	0	0	11
2012_11_27	1	15	10	0	0	0	0	26
2012_11_29	0	3	29	0	0	0	0	32
2012_11_30	0	2	11	0	0	0	0	13
2012_12_14	2	4	19	0	0	0	0	25
2012_12_17	0	6	13	0	0	0	0	19
2013_3_19	1	3	32	1	0	0	0	37
sum	5	45	273	2	0	1	0	326	total
fraction	0.0153374	0.138037	0.837423	0.00613497	0	0.00306748	0	1	check
egl-6(gf)
MT1222 totals	from "egg_laying_data_NR_noodle"
date	1-8	9-25	26+	comma	2-fold	3-fold	L1	day total
2012_8_6	0	0	0	1	4	15	2	22
2012_8_23	0	0	1	3	8	19	2	33
2012_9_5	0	0	0	0	0	0	0	0
2012_9_6	0	0	0	2	3	23	1	29
2012_10_2	0	0	0	0	0	5	0	5
sum	0	0	1	6	15	62	5	89	total
fraction	0	0	0.011236	0.0674157	0.168539	0.696629	0.0561798	1	check
cca-1(n5209)
FQ226 totals	from "egg_laying_data_NR_noodle"
date	1-8	9-25	26+	comma	2-fold	3-fold	L1	day total
2012_9_26	0	1	10	0	0	0	0	11
2012_10_9	1	1	4	0	0	0	0	6
2012_10_15	0	11	9	0	0	0	0	20
2012_11_29	1	11	16	0	0	0	0	28
2013_3_19	1	9	32	0	0	0	0	42
sum	3	33	71	0	0	0	0	107	total
fraction	0.0280374	0.308411	0.663551	0	0	0	0	1	check
egl-6(gf) cca-1(n5209)
FQ46 totals	from "egg_laying_data_NR_noodle"
date	1-8	9-25	26+	comma	2-fold	3-fold	L1	day total
2012_9_26	0	0	18	0	0	0	0	18
2012_8_7	0	0	10	0	0	0	0	10
2012_10_2	0	2	20	0	0	2	0	24
2012_10_3	0	1	14	1	0	0	0	16
2012_10_5	0	0	7	0	0	0	0	7
2012_10_6	0	0	9	0	0	0	0	9
2012_10_15	0	1	14	0	0	0	0	15
2012_11_17	0	3	7	0	0	0	0	10
2012_11_29	0	2	6	0	0	0	0	8
sum	0	9	105	1	0	2	0	117	total
fraction	0	0.0769231	0.897436	0.00854701	0	0.017094	0	1	check
egl-47(gf)
MT2248	from "egl-47 and egl-10 controls"
animal	1-8	9-25	26+	comma	2-fold	3-fold	L1	day total
2013_7_16	0	0	0	0	0	8	0	8
2013_7_20	0	0	0	2	1	9	0	12
2013_8_23	0	0	0	0	0	4	1	5
2013_9_12	0	0	0	0	0	18	6	24
2013_9_19	0	0	0	0	0	11	10	21
2013_9_20	0	0	0	0	0	32	8	40
2013_9_21	0	0	0	0	0	25	7	32
sum	0	0	0	2	1	107	32	142	total
fraction	0	0	0	0.0140845	0.00704225	0.753521	0.225352	1	check
egl-47(gf) cca-1(n5209)
FQ707	from "FQ707_egl_47_n1081_cca_1_n5209"
date	1-8	9-25	26+	comma	2-fold	3-fold	L1	day total
2013_9_12	0	0	0	0	3	6	1	10
2013_9_19	0	0	3	3	1	33	13	53
2013_9_20	0	0	0	1	2	13	0	16
2013_9_21	0	0	0	2	4	8	2	16
sum	0	0	3	6	10	60	16	95	total
fraction	0	0	0.0315789	0.0631579	0.105263	0.631579	0.168421	1	check
egl-10(lf)
MT1443	from "egl-47 and egl-10 controls"
animal	1-8	9-25	26+	comma	2-fold	3-fold	L1	day total
2013_7_13	0	0	0	2	2	17	1	22
2013_7_16	0	0	0	0	0	15	0	15
2013_7_18	0	0	0	1	4	17	0	22
2013_7_19	0	0	0	0	1	18	2	21
2013_7_20	0	0	0	0	0	0	0	0
sum	0	0	0	3	7	67	3	80	total
fraction	0	0	0	0.0375	0.0875	0.8375	0.0375	1	check
egl-10(lf) cca-1(n5209)
FQ666	from "FQ666(egl-10(n692); cca-1(n5209))"
animal	1-8	9-25	26+	comma	2-fold	3-fold	L1	day total
2013_7_13	0	0	0	0	0	1	0	1
2013_7_16	0	0	8	4	1	19	2	34
2013_7_17	0	0	0	4	5	8	0	17
2013_7_18	0	0	1	2	1	1	0	5
2013_7_19	0	0	0	0	8	6	0	14
2013_7_20	0	0	0	2	4	7	0	13
sum	0	0	9	10	15	35	2	84	total
fraction	0	0	0.107143	0.119048	0.178571	0.416667	0.0238095	0.845238	check
