# Supplementary material for: Inhibitory peptidergic modulation of C. elegans serotonin neurons is gated by T-type calcium channels
Source: eLife. 2017 Feb 6;6:e22771. doi: 10.7554/eLife.22771 (PMC5330680; doi:10.7554/eLife.22771)
Supplement: Figure 1—source data 2. — DOI: http://dx.doi.org/10.7554/eLife.22771.004 [file elife-22771-fig1-data2.xlsx]

## Sheet: wild type
File name	20140708T152938; called N2_1 in MatLab		20140708T175215; called N2_2 in MatLab		20140709T085931; called N2_3 in MatLab		20140709T122343; called N2_4 in MatLab		20140709T155217; called N2_5 in MatLab		20140709T182952; called N2_6 in MatLab
*each file is a single animal	event time	eggs laid	event time	eggs laid	event time	eggs laid	event time	eggs laid	event time	eggs laid	event time	eggs laid
	994	1	2437	1	198	2	630	2	517	1	453	1
	1023	2	2530	1	383	1	640	1	529	1	456	1
	2663	1	2571	1	414	1	646	1	1325	1	1561	1
	2671	1	2615	2	967	1	647	1	1337	1	2021	2
	2677	1	2646	2	976	2	653	1	2963	1	2679	1
	2813	1	5106	1	1282	2	654	2	2968	1	3401	1
	2837	1	5123	1	2886	1	1073	2	3030	1	3407	2
	2873	1	5142	1	2891	2	3600	2	3835	1	5574	1
	4612	1	5201	1	2950	2	3784	2	3846	2	5801	2
	4619	1	6872	1	3581	1	6397	2	3886	1	6286	2
	4671	1	6896	1	4396	1	6406	2			6802	2
	4684	1			6013	2	6408	1
	6639	1			6865	2	6412	1
	6642	1			6902	2	6468	1
					7098	2	6472	1
	total	15	total	13	total	24	total	24	total	11	total	16
													103 total eggs laid
													average per animal:	17.1667

## Sheet: cca-1(n5209)
File name	20140914T160511; called FQ226_1 in MatLab		20140918T122421; called FQ226_2 in MatLab		20140919T125427; called FQ226_5 in MatLab		20141022T123424; called FQ226_6 in MatLab		20141022T170658; called FQ226_7 in MatLab
*each file is a single animal	event time	eggs laid	event time	eggs laid	event time	eggs laid	event time	eggs laid	event time	eggs laid
	1316	1	3	1	338	2	527	2	67	2
	3139	1	35	1	361	2	1171	3	721	1
	3183	2	131	1	2298	2	3833	2	752	2
	4179	1	223	1	2357	1	4095	1	2127	1
	4230	1	365	1	5052	2	4510	1	5352	2
			2743	2	5082	1	6095	1	5501	1
			4141	2	5083	1	6300	2	5579	2
					5085	1	6494	2	6016	2
					5117	1			6555	2
									6652	1
	total	6	total	9	total	13	total	14	total	16
											58 total eggs laid
											average per animal:	11.6
