# Supplementary material for: Inhibitory peptidergic modulation of C. elegans serotonin neurons is gated by T-type calcium channels
Source: eLife. 2017 Feb 6;6:e22771. doi: 10.7554/eLife.22771 (PMC5330680; doi:10.7554/eLife.22771)
Supplement: Figure 3—source data 1. — DOI: http://dx.doi.org/10.7554/eLife.22771.010 [file elife-22771-fig3-data1.xlsx]

## Sheet: Sheet1
egl-6(n592) cca-1(n5209)/+
FQ46xFQ67 non-muvs		from "non-muvs_egg_laying"
date	1-8	9-25	26+	comma	2-fold	3-fold	L1	day total
2013_4_8	0	0	3	0	0	0	0	3
2013_4_9	0	0	5	0	0	0	0	5
2013_4_11	0	0	5	1	0	0	0	6
2013_4_13	0	0	0	0	0	0	0	0
2013_4_16	0	0	17	6	4	9	0	36
2013_4_17	0	0	8	5	5	12	0	30
sum	0	0	38	12	9	21	0	80	total
fraction	0	0	0.475	0.15	0.1125	0.2625	0	1	check
egl-6(n592) cca-1(∆)
FQ232		from "cca_1_egg_laying_data_NR_noodle"
date	1-8	9-25	26+	comma	2-fold	3-fold	L1	day total
2012_10_3	0	0	4	6	4	3	0	17
2012_12_14	0	0	0	2	2	5	0	9
2012_12_17	0	0	13	17	8	17	0	55
2012_12_18	0	0	2	6	3	2	0	13
sum	0	0	19	31	17	27	0	94	total
fraction	0	0	0.202128	0.329787	0.180851	0.287234	0	1	check
cca-1(∆)
JD21		from "cca_1_egg_laying_data_NR_noodle"
date	1-8	9-25	26+	comma	2-fold	3-fold	L1	day total
2012_8_23	0	0	32	5	5	2	0	44
2012_9_11	0	0	21	8	1	2	0	32
2012_11_17	0	0	6	0	0	0	0	6
20120_11_30	0	0	17	0	0	0	0	17
sum	0	0	76	13	6	4	0	99	total
fraction	0	0	0.767677	0.131313	0.0606061	0.040404	0	1	check
