# Supplementary material for: Inhibitory peptidergic modulation of C. elegans serotonin neurons is gated by T-type calcium channels
Source: eLife. 2017 Feb 6;6:e22771. doi: 10.7554/eLife.22771 (PMC5330680; doi:10.7554/eLife.22771)
Supplement: Figure 5—source data 1. — DOI: http://dx.doi.org/10.7554/eLife.22771.014 [file elife-22771-fig5-data1.xlsx]

## Sheet: Sheet1
goa-1(lf); egl-6(gf)
MT16698	from "does n5209 enhance n1134"
date	1-8	9-25	26+	comma	2-fold	3-fold	L1	day total
2014_8_27	2	0	0	0	0	0	0	2
2014_8_28	4	6	3	0	0	0	0	13
2014_8_29	3	17	13	2	1	1	0	37
2014_8_30	9	12	3	0	0	0	0	24
2014_9_3	14	27	9	0	0	0	0	50
sum	32	62	28	2	1	1	0	126	total
fraction	0.253968	0.492063	0.222222	0.015873	0.00793651	0.00793651	0	1	check
goa-1(lf); egl-6(gf) cca-1(n5209)
FQ863	from "does n5209 enhance n1134"
date	1-8	9-25	26+	comma	2-fold	3-fold	L1	day total
2014_8_27	7	3	0	0	0	0	0	10
2014_8_28	4	2	1	0	0	0	0	7
2014_8_29	12	5	1	0	0	0	0	18
2014_8_30	13	3	0	0	0	0	0	16
2014_9_3	10	2	0	0	0	0	0	12
sum	46	15	2	0	0	0	0	63	total
fraction	0.730159	0.238095	0.031746	0	0	0	0	1	check
flp-17(∆)flp-10(∆); egl-6(gf)
FQ37	from "does n5209 enhance flp_10 flp_17"
date	1-8	9-25	26+	comma	2-fold	3-fold	L1	day total
2014_9_14	0	1	23	6	2	2	0	34
2014_9_15	0	0	41	13	3	8	1	66
2014_9_17	0	0	38	9	0	0	0	47
sum	0	1	102	28	5	10	1	147	total
fraction	0	0.00680272	0.693878	0.190476	0.0340136	0.0680272	0.00680272	1	check
flp-17(∆)flp-10(∆); egl-6(gf) cca-1(n5209)
FQ892	from "does n5209 enhance flp_10 flp_17"
date	1-8	9-25	26+	comma	2-fold	3-fold	L1	day total
2014_9_13	1	7	16	0	0	0	0	24
2014_9_14	1	5	14	0	0	0	0	20
2014_9_15	0	3	27	0	0	0	0	30
2014_9_17	1	11	23	1	0	0	1	37
sum	3	26	80	1	0	0	1	111	total
fraction	0.027027	0.234234	0.720721	0.00900901	0	0	0.00900901	1	check
egl-1(gf)
MT1082	from "data for HSN_dependence_FQ810"
date	1-8	9-25	26+	comma	2-fold	3-fold	L1	day total
2014_3_18	0	0	0	0	1	1	1	3
2014_3_19	0	0	2	0	0	13	5	20
2014_3_20	0	0	0	0	0	10	3	13
2014_3_21	0	0	0	0	1	39	7	47
sum	0	0	2	0	2	63	16	83	total
fraction	0	0	0.0240964	0	0.0240964	0.759036	0.192771	1	check
egl-1(gf); cca-1(n5209)
FQ810	from "data for HSN_dependence_FQ810"
date	1-8	9-25	26+	comma	2-fold	3-fold	L1	day total
2014_3_18	0	0	0	0	1	13	0	14
2014_3_19	0	0	2	1	1	18	7	29
2014_3_20	0	0	0	0	0	26	6	32
2014_3_21	0	0	0	0	0	21	8	29
sum	0	0	2	1	2	78	21	104	total
fraction	0	0	0.0192308	0.00961538	0.0192308	0.75	0.201923	1	check
