# Supplementary material for: Inhibitory peptidergic modulation of C. elegans serotonin neurons is gated by T-type calcium channels
Source: eLife. 2017 Feb 6;6:e22771. doi: 10.7554/eLife.22771 (PMC5330680; doi:10.7554/eLife.22771)
Supplement: Figure 6—figure supplement 1—source data 1. — DOI: http://dx.doi.org/10.7554/eLife.22771.019 [file elife-22771-fig6-figsupp1-data1.xlsx]

## Sheet: Sheet1
strain	genotype	1 GFP+ VC	2 GFP+ VCs	total assayed		data found in "site of action egg-laying"
FQ604	wzEx125[Promcca-1(3kb)::GFP]	3	16	19
FQ757	lin-39(n709);egl-6(gf) cca-1(n5209); wzEx125[Promcca-1(3kb)::GFP]	0	1	13
