# Supplementary material for: Inhibitory peptidergic modulation of C. elegans serotonin neurons is gated by T-type calcium channels
Source: eLife. 2017 Feb 6;6:e22771. doi: 10.7554/eLife.22771 (PMC5330680; doi:10.7554/eLife.22771)
Supplement: Figure 6—source data 1. — DOI: http://dx.doi.org/10.7554/eLife.22771.016 [file elife-22771-fig6-data1.xlsx]

## Sheet: Sheet1
strain	genotype	GFP+ VC	total assayed	ratio with GFP+ VC		see page 39 of LNB # 14 (8/26/16)
FQ1447	lin-39(709); wzEx355[Promcca-1::GFP; Promegl-6a::mStrawberry]	2	26	0.0769231
FQ1348	wzEx355[Promcca-1::GFP; Promegl-6a::mStrawberry]	21	23	0.913043
