# Supplementary material for: Inhibitory peptidergic modulation of C. elegans serotonin neurons is gated by T-type calcium channels
Source: eLife. 2017 Feb 6;6:e22771. doi: 10.7554/eLife.22771 (PMC5330680; doi:10.7554/eLife.22771)
Supplement: Figure 6—source data 2. — DOI: http://dx.doi.org/10.7554/eLife.22771.017 [file elife-22771-fig6-data2.xlsx]

## Sheet: Sheet1
egl-6(n592) cca-1(n5209); wzEx125[Promcca-1(3kb)::GFP]
FQ862		from "site of action egg_laying"
date	1-8	9-25	26+	comma	2-fold	3-fold	L1	day total
2014_6_13	0	2	46	1	1	4	1	55
2014_6_14	0	4	15	5	2	0	0	26
2014_6_25	0	3	28	0	0	0	0	31
sum	0	9	89	6	3	4	1	112	total
fraction	0	0.0803571	0.794643	0.0535714	0.0267857	0.0357143	0.00892857	1	check
lin-39(n709); egl-6(n592) cca-1(n5209); wzEx125[Promcca-1(3kb)::GFP]
FQ757		from "site of action egg_laying"
date	1-8	9-25	26+	comma	2-fold	3-fold	L1	day total
2013_12_18	1	3	23	0	0	0	0	27
2013_12_19	2	6	32	0	0	0	3	43
2013_12_20	2	4	7	0	0	0	0	13
2014_6_13	0	2	5	0	0	0	0	7
2014_6_25	1	3	11	0	0	0	0	15
sum	6	18	78	0	0	0	3	105	total
fraction	0.0571429	0.171429	0.742857	0	0	0	0.0285714	1	check
egl-6(gf) cca-1(n5209); wzEx402[Promegl-6a::cca-1 RNAi]
FQ1468		from "egl_6_cca_1_3'RNAi"
date	1-8	9-25	26+	comma	2-fold	3-fold	L1	day total
2016_8_30	0	0	4	0	0	7	2	13
2016_8_31	0	0	4	0	1	5	0	10
2016_9_1	0	0	0	1	3	10	1	15
2016_9_2	0	0	7	1	2	24	1	35
sum	0	0	15	2	6	46	4	73	total
fraction	0	0	0.205479	0.0273973	0.0821918	0.630137	0.0547945	1	check
egl-6(gf) cca-1(n5209); wzEx360[Promceh-24::cca-1 RNAi]
FQ1357		from "ceh_24_cca_1_3'RNAi"
date	1-8	9-25	26+	comma	2-fold	3-fold	L1	day total
2016_6_9	0	0	9	4	5	5	0	23
2016_6_10	0	0	18	8	3	0	2	31
2016_6_13	0	0	31	7	1	1	0	40
sum	0	0	58	19	9	6	2	94	total
fraction	0	0	0.617021	0.202128	0.0957447	0.0638298	0.0212766	1	check
egl-6(gf) cca-1(n5209); wzEx367[Promcca-1(3kb)::cca-1 RNAi]
FQ1364		from "cca_1_cca_1_3'RNAi"
date	1-8	9-25	26+	comma	2-fold	3-fold	L1	day total
2016_6_7	0	0	1	0	1	0	0	2
2016_6_8	0	0	2	0	0	0	0	2
2016_6_9	0	0	12	7	1	2	0	22
2016_6_10	0	0	5	1	1	0	0	7
2016_6_13	0	0	18	0	0	0	0	18
sum	0	0	38	8	3	2	0	51	total
fraction	0	0	0.745098	0.156863	0.0588235	0.0392157	0	1	check
