# Supplementary material for: Inhibitory peptidergic modulation of C. elegans serotonin neurons is gated by T-type calcium channels
Source: eLife journal article supplement (doi:10.7554/elife.22771), 2017-02-06

File: pKEZ18\_KZ36.ab1      Run Ended: 2015/8/26 14:45:52      Signal G:176 A:158 C:185 T:150  
 Sample: pKEZ18\_KZ36      Lane: 67      Base spacing: 14.490241      1197 bases in 13763 scans      Page 1 of 2

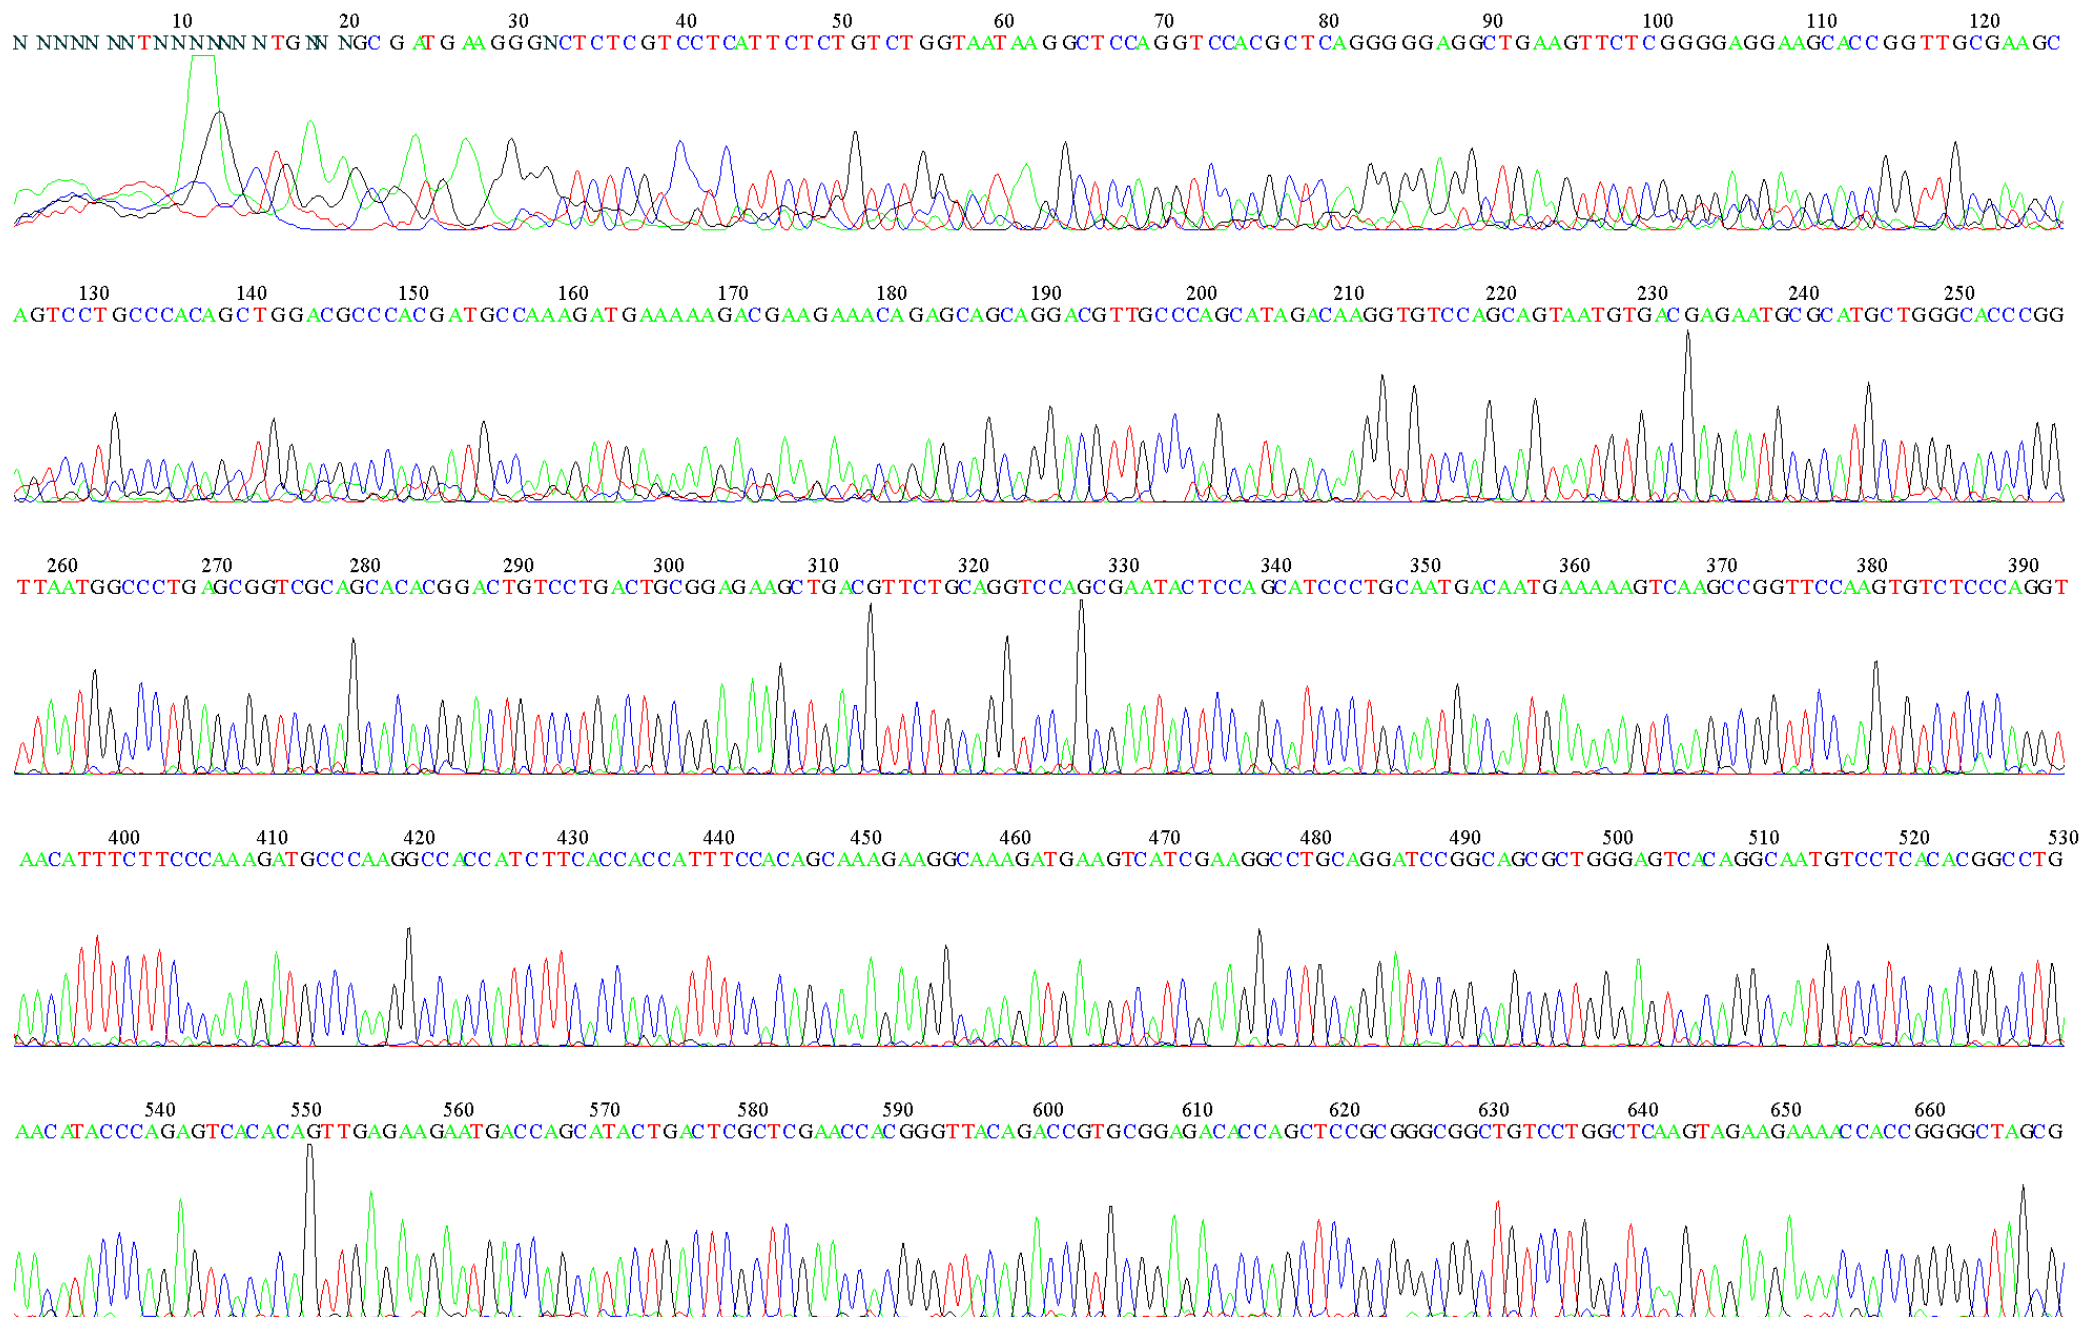

File: pKEZ18\_KZ36.ab1

Run Ended: 2015/8/26 14:45:52

Signal G:176 A:158 C:185 T:150

Sample: pKEZ18\_KZ36

Lane: 67

Base spacing: 14.490241

1197 bases in 13763 scans

Page 2 of 2

670 680 690 700 710 720 730 740 750 760 770 780 790 800  
CCGGG ACGGCAGCCCCCTCCGCTCGGA TCCGCCTGCCCGG CCTTTTC TCGA CCCGGCC CTGCCGNC CCCGGC CCGGACGGTCGTTGAGCTGCGTGA GCTACGGGCTGTCCGACTCCTCGGCG CCCT

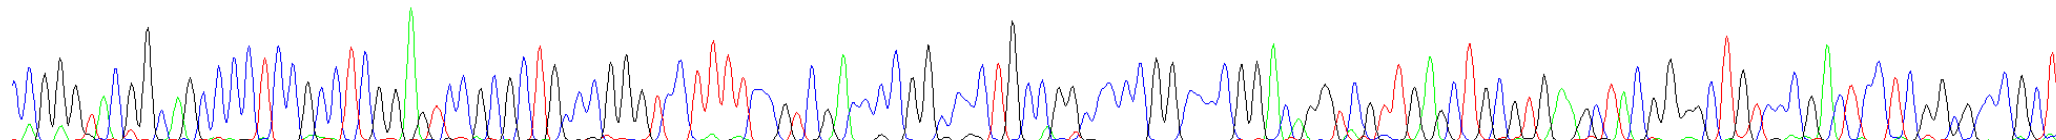

810 820 830 840 850 860 870 880 890 900 910 920  
CCATCCTCT CCTCG CCATCTCTGGC AGCCG GGCCCGGGGGTCCGAA AGG GCGAGCGAGCCCTCAAGGAGG GTCTCACGCACGGGACC GGTGGGGAG ATGTGGAA CCATTCTCG TGA GGGG ATT

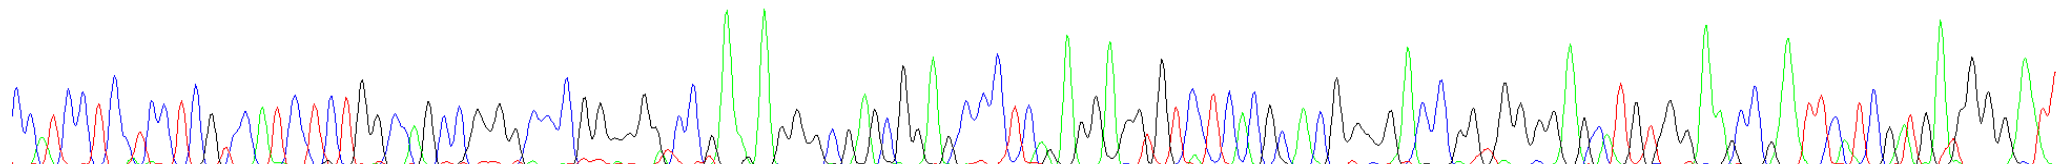

930 940 950 960 970 980 990 1000 1010 1020 1030 1040 1050  
GACTGCAAAAGTGA CGTTATCTGA CTT TGC AAAAANC AGC AGCTGGTAC GA CTCGAATATTCG CCTA AGGAGC CATACATTCCTGCCG CGTTTACACGCTGTCTGGAAACCTGCGTACCATTAT

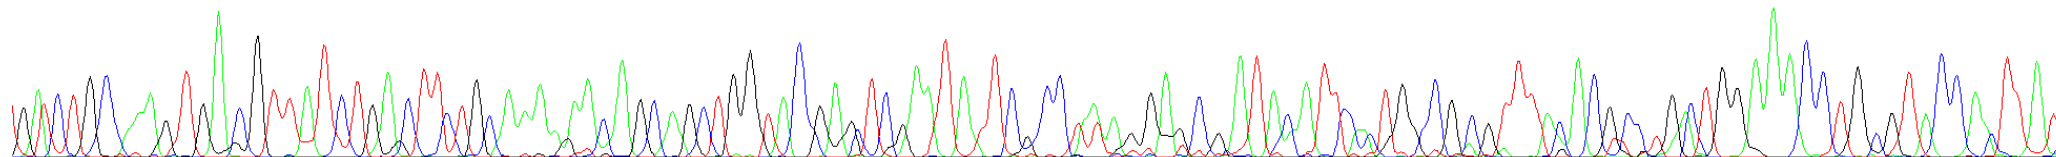

1060 1070 1080 1090 1100 1110 1120 1130 1140 1150 1160 1170  
CCNTGCACANTC CC TT CGCAGTGC GAAN CAAAGCCGC NNNCGCTTCCANN TNCNNCTGATGC AAGGNCC GAGNG ATTT CCTACATTGGCGATTCA CC GATGGNC CTCANANTC GCTNNNA

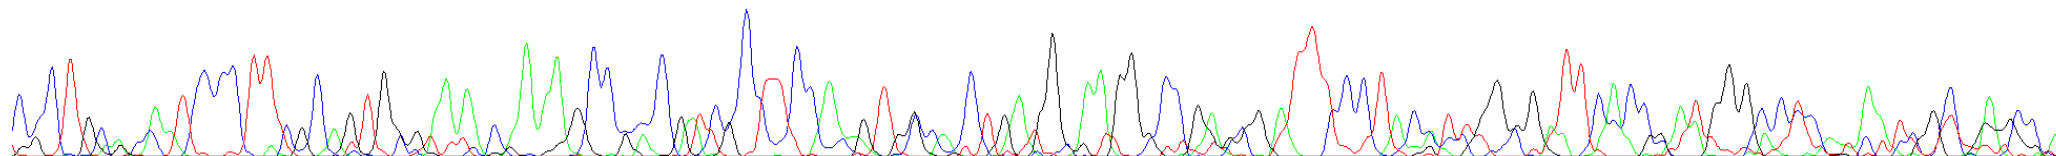

1180 1190  
ANTACCA CCNACC GCAACC GT A

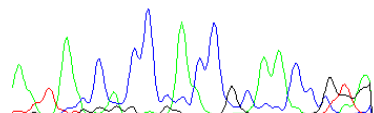

Supplement: supp [file elife-22771-supp-v1.zip]
