# Supplementary material for: Inhibitory peptidergic modulation of C. elegans serotonin neurons is gated by T-type calcium channels
Source: eLife. 2017 Feb 6;6:e22771. doi: 10.7554/eLife.22771 (PMC5330680; doi:10.7554/eLife.22771)
Supplement: Supplementary file 4. — DOI: http://dx.doi.org/10.7554/eLife.22771.027 [file elife-22771-supp4.docx]

**Primers and plasmids used in this study:**

| Genotyping Primer Name | Primer Sequence 5’🡪 3’ |
| --- | --- |
| *egl-6(wt)* forward | TTCACAACGACGATCGTTGGCG |
| *egl-6(n592)* forward | CATTCACAACGACGATCGTTGCCA |
| *egl-6* universal reverse | ATTAACGACGGAAGTAGTTTGAACAC |
| *cca-1(wt)* forward | AAACATAAAAGAAGCACATTTCCAAGCATGTG |
| *cca-1(n5209)* forward | AAAAAACATAAAAGAAGCACATTTCCAAGCATGTA |
| *cca-1* universal reverse | ACTAACAACTCATGTTCGGCCGTTGATAAA |
| *lin-39(wt)* forward | GGATGACGGTGATGTTGATGTGGTCTTC |
| *lin-39 (n709)* forward | GATGACGGTGATGTTGATGTGGTCAGT |
| *lin-39* universal reverse | CATCTCTATCGTCCTCTTATTCTATTCCCTCATCC |
| *goa-1(wt)* forward | CCGTTCATCAACTCTAGCGCCACG |
| *goa-1(n1134)* forward | CACCGTTCATCAACTCTAGCGCCAAA |
| *goa-1* universal reverse | TTAATAATTCAAATCGATCAAACGAAA |

| Constructed Plasmid Name | Description |
| --- | --- |
| pSAZ66 | *Promcca-1(3kb)::GFP* |
| pNR559 | *Promegl-6a::GCaMP6f* |
| pKEZ52 | *Promceh-24::GCaMP6f* |
| pEH30 | *Promegl-6a::mStrawberry* |
| pEH4 | *cca-1 fosmid::GFP* |
| pKEZ93 | *Promegl-6a::cca-1* RNAi antisense |
| pKEZ67 | *Promegl-6a::cca-1* RNAi sense |
| pKEZ66 | *Promceh-24::cca-1* RNAi antisense |
| pKEZ65 | *Promceh-24::cca-1* RNAi sense |
| pKEZ63 | *Promcca-1(3kb)::cca-1* RNAi antisense |
| pKEZ64 | *Promcca-1(3kb)::cca-1* RNAi sense |
| pKEZ18 | Cav3.1(P262S) in pGEMHEA |

| Injected Constructs | Injection Concentration |
| --- | --- |
| *Promttx-3::mStrawberry* | 40 ng ul-1 |
| *lin-15*(+) | 15-30 ng ul-1 |
| *Promunc-122::mCherry* | 20 ng ul-1 |
| *Promegl-6a::GCaMP6f* | 100 ng ul-1 |
| *Promceh-24::GCaMP6f* | 100 ng ul-1 |
| *Promflp-17::mStrawberry* | 30 ng ul-1 |
| *Promcca-1::GFP* fosmid amplicon | 40 ng ul-1 |
| RNAi constructs | 100 ng ul-1 |
