# Supplementary figures and images for: Inhibitory peptidergic modulation of C. elegans serotonin neurons is gated by T-type calcium channels
Source: eLife journal article supplement (doi:10.7554/elife.22771), 2017-02-06

A

## Calcium imaging from Vulval Muscles

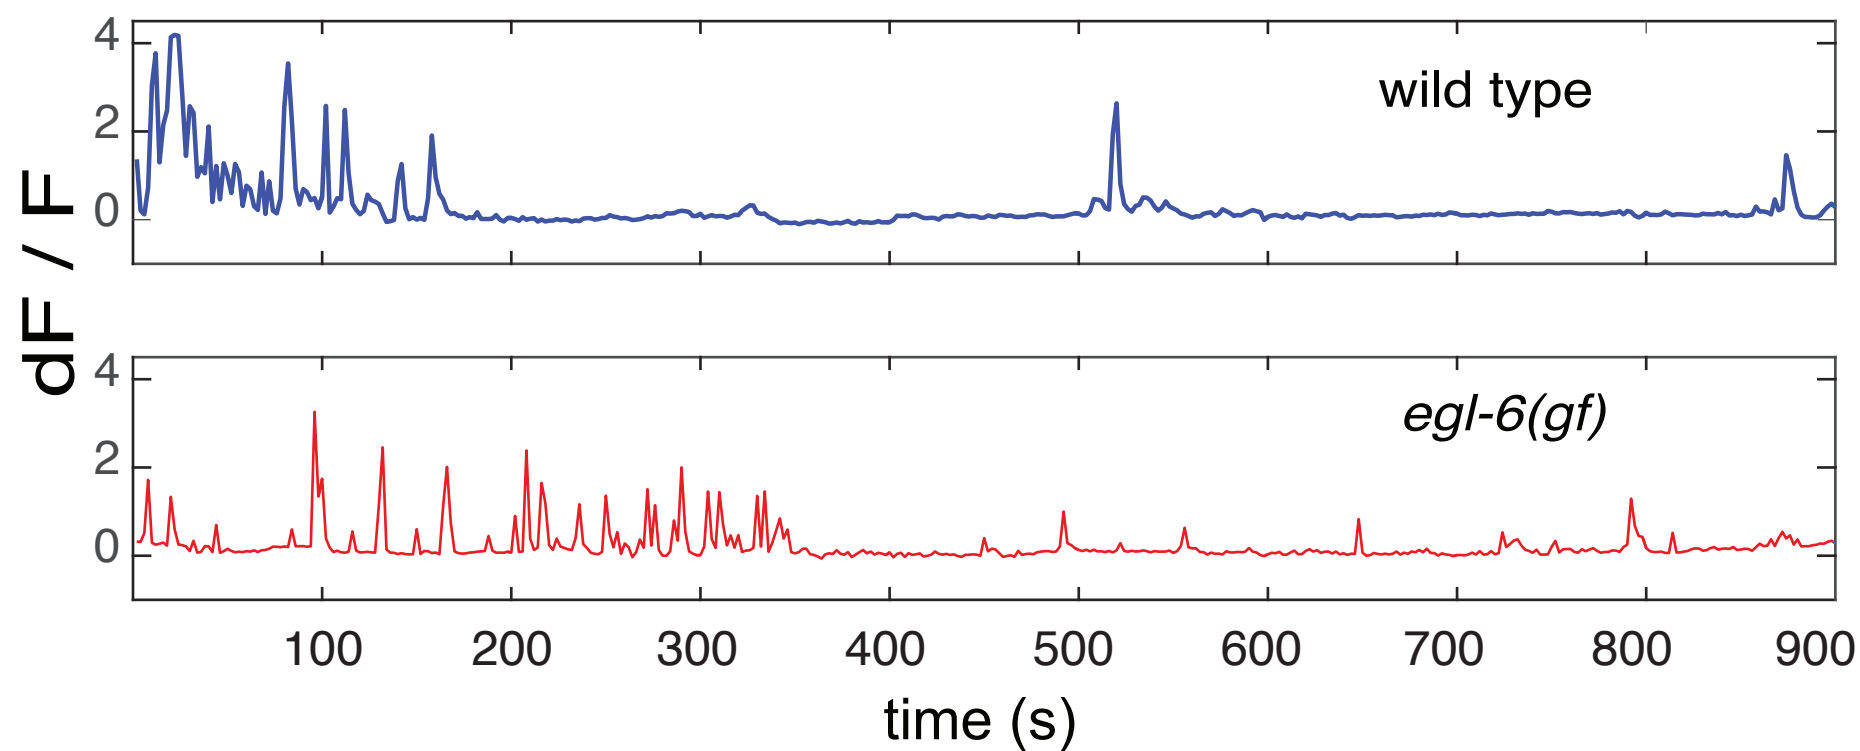

B

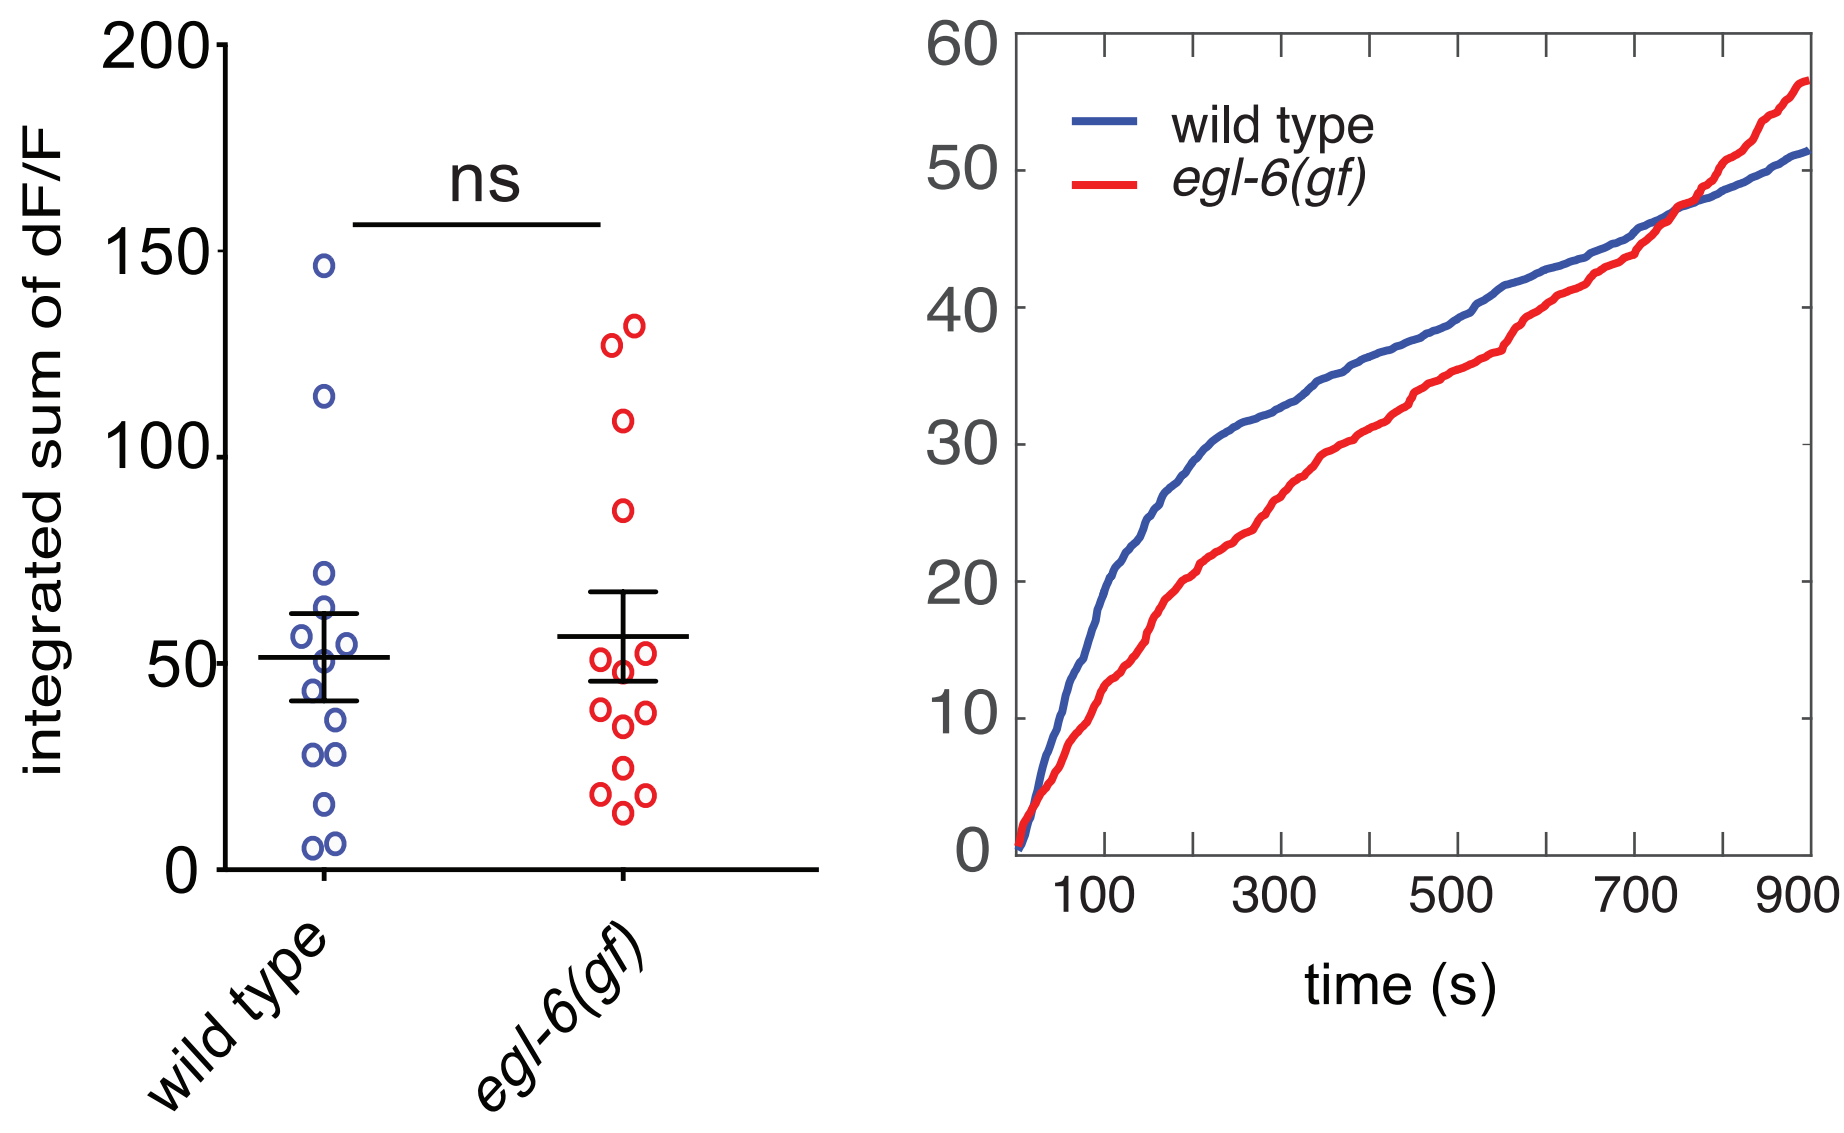

Supplement: supp [file elife-22771-supp-v1.zip]

A

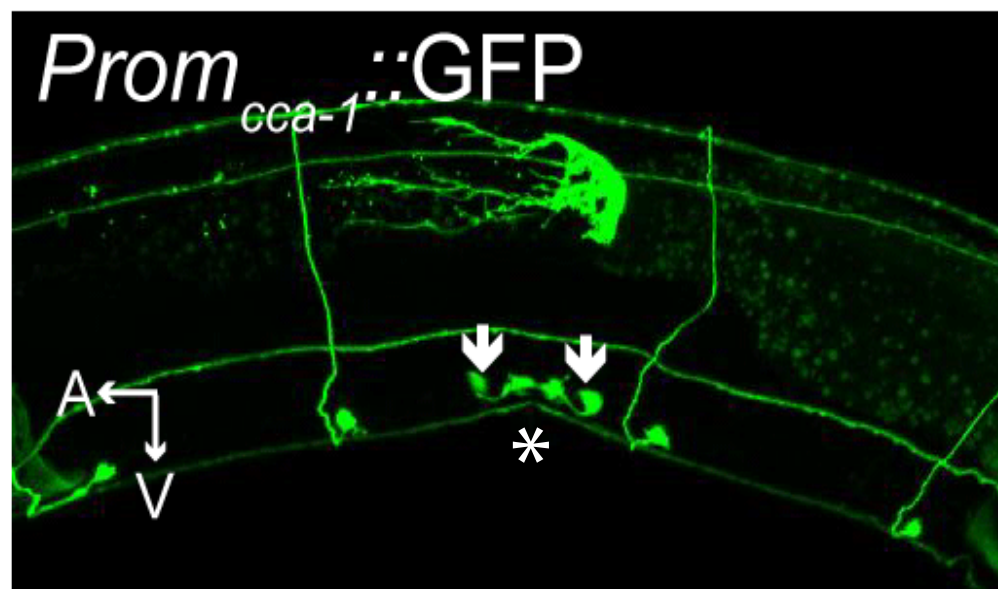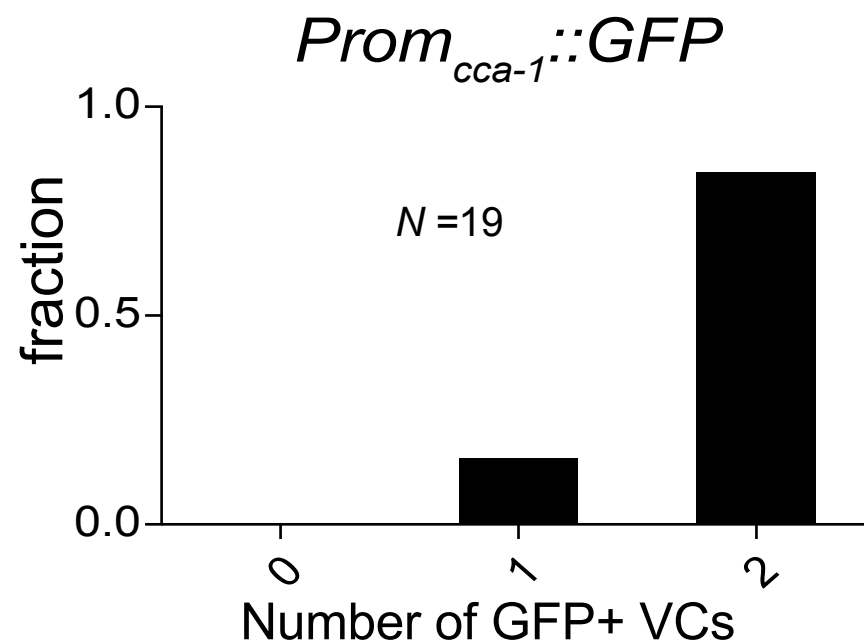

B

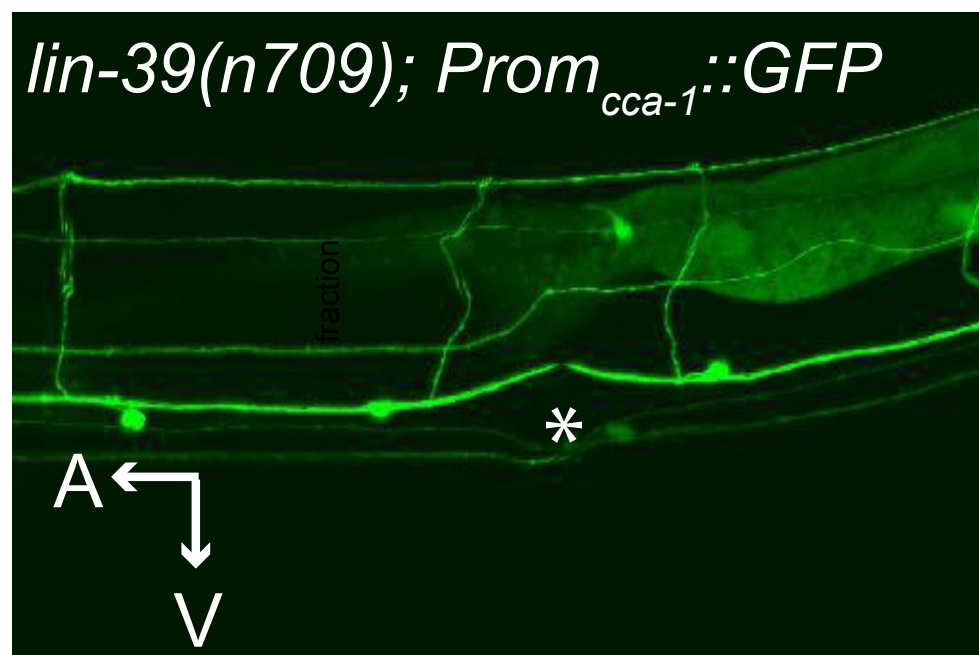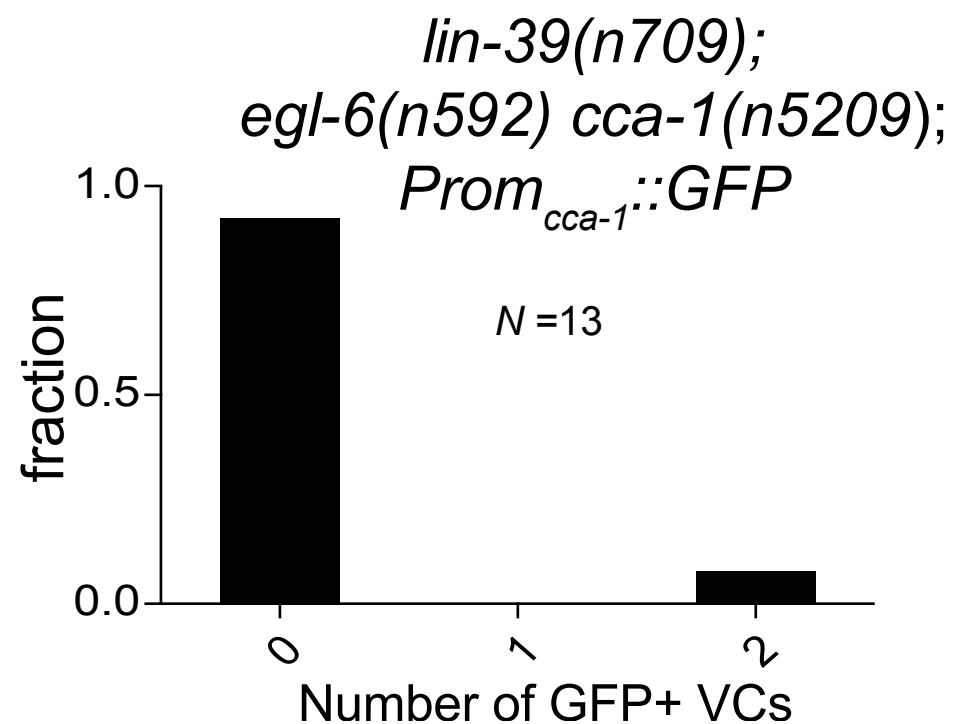

Supplement: supp [file elife-22771-supp-v1.zip]

## I-V Relationships

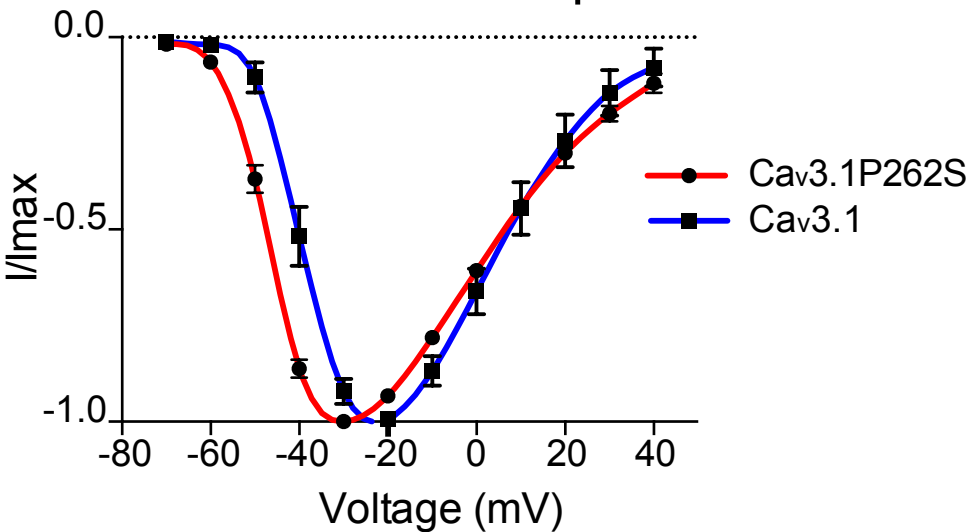

Supplement: supp [file elife-22771-supp-v1.zip]

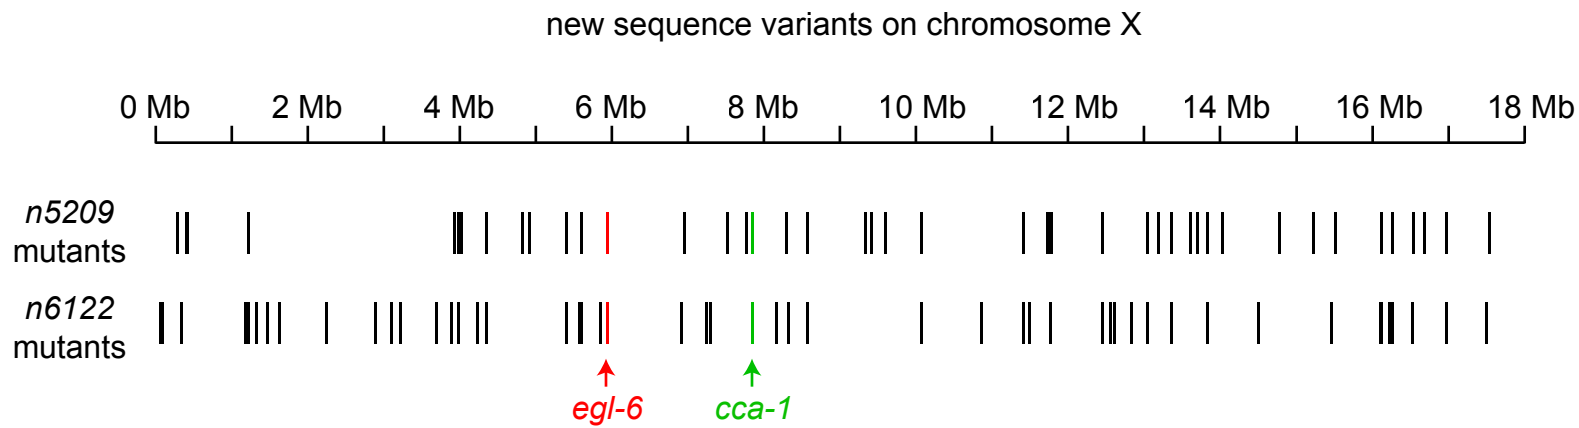

Supplement: supp [file elife-22771-supp-v1.zip]

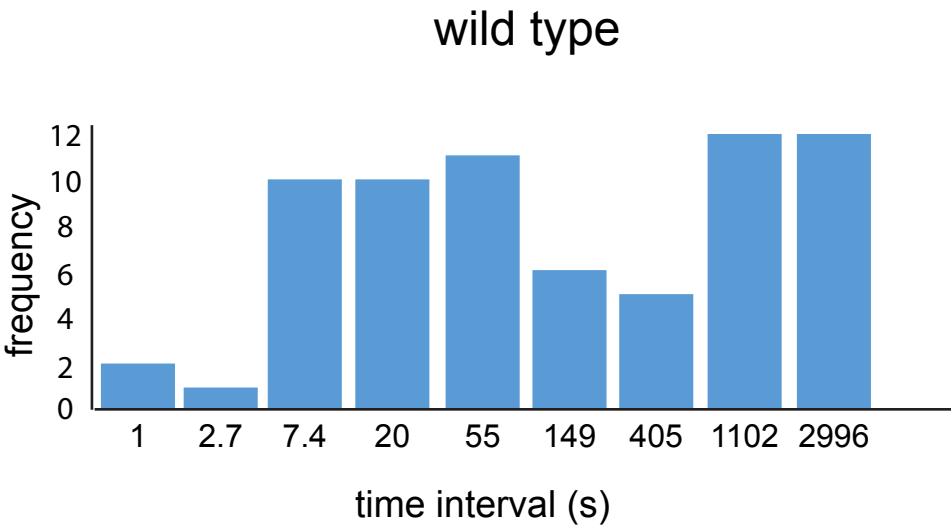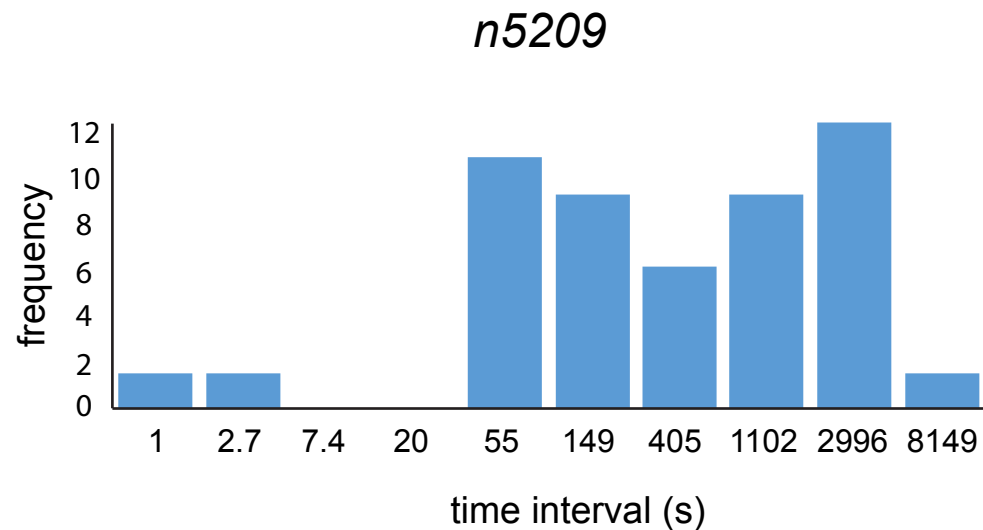

Supplement: supp [file elife-22771-supp-v1.zip]

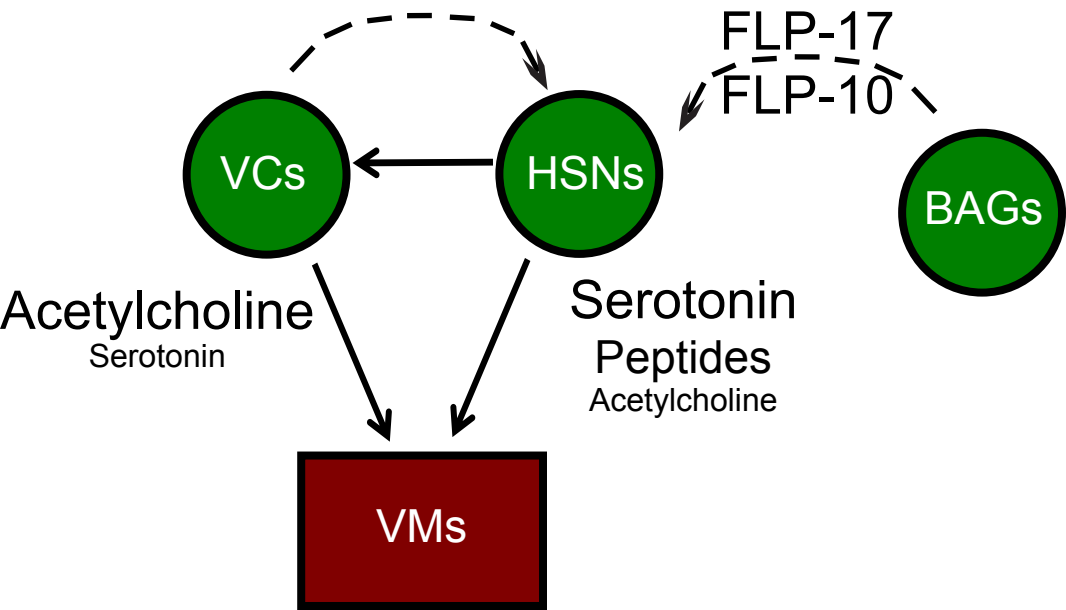

Supplement: supp [file elife-22771-supp-v1.zip]

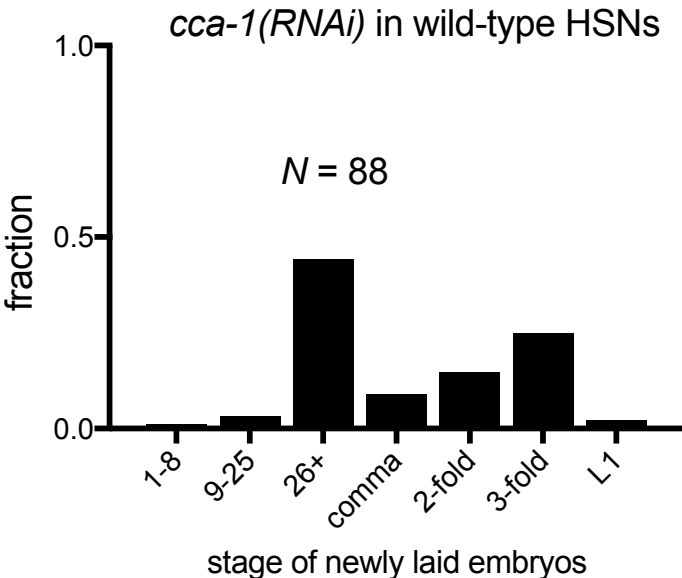

Supplement: supp [file elife-22771-supp-v1.zip]
